# Supplementary material
Source: PubMed Central journal article supplement (PMC2807210)
Supplement: suppdata.pdf [file suppdata.pdf]

Supplemental Table 1. Multiple regression models for pre-training work, post-training work and changes in work including sex as a covariate.

| Work, kg·m    | Nearest Marker | Covariate       | LOD   | % variance | p-value |
|---------------|----------------|-----------------|-------|------------|---------|
| Pre-training  | rs4222922      | Chr 1 @ 92.0cM  | 2.32  | 2.3        | 0.024   |
|               | rs4223268      | Chr 2 @ 48.0cM  | 3.02  | 4.2        | 0.003   |
|               | rs3672755      | Chr 3 @ 49.3cM  | 3.52* | 2.9        | 0.013   |
|               | rs3089148      | Chr8 @ 36.0cM   | 3.36  | 6.1        | 0.0003  |
|               | rs3689508      | Chr14 @ 4.0cM   | 3.72  | 5.5        | 0.001   |
|               | rs3679049      | Chr 19 @ 34.4cM | 3.63  | 5.6        | 0.001   |
|               |                | Model           |       | 30.1       | 0.000   |
| Post-training |                | Sex             |       | 4.35       | 0.003   |
|               | rs3687177      | Chr 3 @ 60 cM   | 4.66  | 7.3        | 0.0001  |
|               | rs3667625      | Chr 4 @ 30.6 cM | 2.69  | 3.2        | 0.01    |
|               | rs3660830      | Chr 14 @ 26 cM  | 4.99  | 5.7        | 0.01    |
|               |                | Model           |       | 21.8       | 0.000   |
| Change        |                | Sex             |       | 4.8        | 0.004   |
|               | rs3023267      | Chr 11 @ 45cM   | 2.30  | 2.5        | 0.004   |
|               | rs3660830      | Chr 14 @ 36 cM  | 2.25  | 2.1        | 0.037   |
|               |                |                 | Model |            | 8.6     |

Chr, chromosome; LOD, peak LOD score obtained in interval mapping; % variance, % of phenotypic variance accounted for by variable; Nearest Marker, SNP marker closest the LOD peak; \*, indicates LOD score is from genome-wide scan with covariate(s). Note the covariate sex was dropped from the final model for pre-training work. Pre-training work was not significantly different between male and female F<sub>2</sub> mice ( $2.07 \pm 0.09$  kg·m for males vs  $2.10 \pm 0.08$  kg·m for females,  $P = 0.1$ ). In contrast, post-training work ( $3.82 \pm 0.14$  kg·m vs.  $3.36 \pm 0.11$  kg·m,  $P < 0.001$ ) and the change in work ( $1.75 \pm 1.23$  kg·m vs.  $1.26 \pm 0.96$  kg·m,  $P = 0.004$ ) were significantly higher in male compared to female F<sub>2</sub> mice.

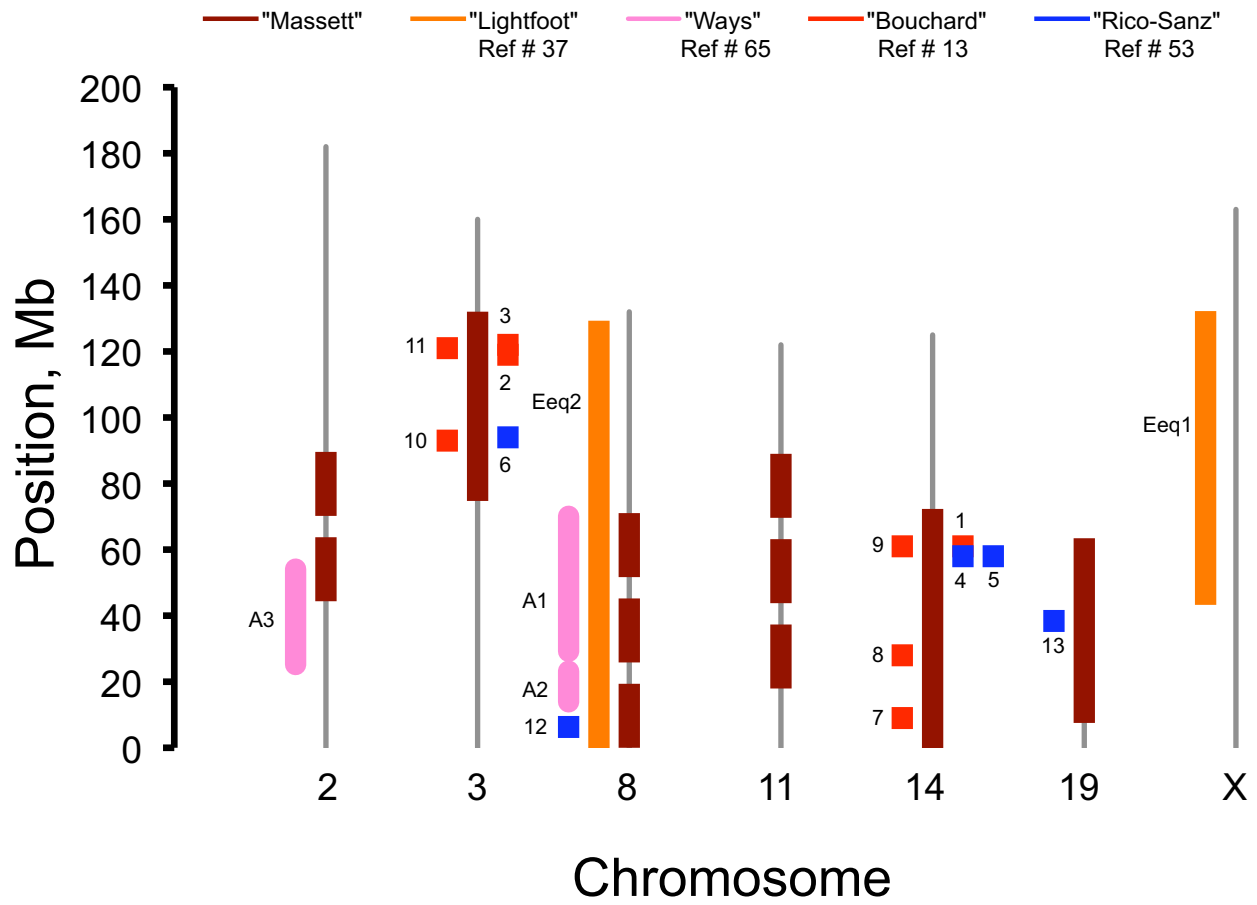

## Supplemental Figure Legend

Supplemental Figure 1. Comparison of exercise-related QTL among mouse, rat, and human. Each bar or dot represents a unique QTL. The location of each QTL is based on the reported confidence interval or the LOD score peak, if no interval was given. All QTL were mapped to homologous regions of the mouse genome. Significant (solid line) and suggestive (dashed line) QTL for pre-training work, post-training work, and the change in work are represented by maroon bars. QTL for pre-training exercise capacity in mice (Lightfoot et al., ref #37), rats (Ways et al., Ref #65), and humans (Bouchard et al., Ref #13 and Rico-Sanz, Ref #53) are to the left of each chromosome. QTL for training responses (MPO and VO<sub>2max</sub>) in humans are to the right of each chromosome. The homology comparisons were synthesized from the following sources: [http://www.informatics.jax.org/reports/homology\\_map/mouse\\_human.shtml](http://www.informatics.jax.org/reports/homology_map/mouse_human.shtml) and <http://www.rgd.mcg.edu/VCMAP/mapview.shtml>. Eeq1, Endurance exercise QTL 1; Eeq2, Endurance exercise QTL 2; A1, Aerobic running capacity 1; A2, Aerobic running capacity 2; A3, Aerobic running capacity 3; 1, D13S787; 2, D1S534; 3, FABP2; 4, D13787; 5, D13S1775; 6, S100STUI; 7, D3S1766; 8, D3S1447; 9, D13S787; 10, S100A1; 11, D1S534; 12, D13S796; 13, D10S677. These data suggest that there is some concordance among rodent and human exercise-related QTL.
